# Supplementary material for: Response of Pinus tabuliformis saplings to continuous autumn fertilization treatments in the mountains of Eastern Liaoning Province, China
Source: PeerJ. 2022 Jan 28;10:e12853. doi: 10.7717/peerj.12853 (PMC8802711; doi:10.7717/peerj.12853)
Supplement: Supplemental Information 1 [file peerj-10-12853-s001.xlsx]

## Sheet: Tree height
			Jul.2018	Nov.2018	Jul.2019	Nov.2019	Jul.2020	Nov.2020				N1	N2	P1	P2	N1P1	N1P2	N2P1	N2P2	CK
		N1	3.47167	3.50611	3.59325	3.59655	3.81333	3.93952			Jul.2018	3.50833	3.775	3.8875	3.73333	3.74583	3.70833	3.525	3.80417	3.49286
		N2	3.72778	3.76639	3.80433	3.81563	4.12028	4.185				3.515	3.90833	3.43333	3.15833	3.39	3.47083	3.57083	3.99167	3.4125
		P1	3.62083	3.6398	3.66889	3.67478	3.96966	4.02952				3.39167	3.5	3.54167	3.88333	3.63333	3.775	3.62917	3.62917	3.4625
		P2	3.59167	3.60655	3.67512	3.69911	4.03407	4.04306				3.47167	3.72778	3.62083	3.59167	3.58972	3.65139	3.575	3.80833	3.45595
		N1P1	3.58972	3.64981	3.70392	3.72389	4.06049	4.16755
		N1P2	3.65139	3.67086	3.71528	3.71992	3.92058	3.99406			Nov.2018	3.7	3.79917	4.02273	3.81	3.97444	3.74091	3.62273	4.07222	3.5925
		N2P1	3.575	3.58021	3.7976	3.81639	4.0634	4.201				3.44417	3.77	3.475	3.3425	3.39083	3.47167	3.559	4.02167	3.41143
		N2P2	3.80833	3.85852	3.92463	3.92917	4.2509	4.25273				3.37417	3.73	3.42167	3.66714	3.58417	3.8	3.55889	3.48167	3.38222
		CK	3.45595	3.46205	3.48433	3.57833	3.66222	3.70778				3.50611	3.76639	3.6398	3.60655	3.64981	3.67086	3.58021	3.85852	3.46205
											Jul.2019	3.57875	3.78	3.745	3.72429	3.82375	3.455	3.75167	3.7975	3.48
												3.646	3.985	3.58667	3.39273	3.518	3.74833	3.84364	4.20889	3.628
												3.555	3.648	3.675	3.90833	3.77	3.9425	3.7975	3.7675	3.345
												3.59325	3.80433	3.66889	3.67512	3.70392	3.71528	3.7976	3.92463	3.48433
											Nov.2019	3.49143	3.84143	3.86667	3.79833	3.66	3.7025	3.75917	4.10333	3.73
												3.67222	3.87	3.55625	3.444	3.655	3.74125	3.88917	4.02	3.62
												3.626	3.73545	3.60143	3.855	3.85667	3.716	3.80083	3.66417	3.385
												3.59655	3.81563	3.67478	3.69911	3.72389	3.71992	3.81639	3.92917	3.57833
											Jul.2020	3.57	4.15	4.04667	4.015	4.05875	3.9075	4.02667	4.16444	3.83
												4.02375	4.2875	3.90857	3.74222	3.96273	3.86625	4.029	4.49625	3.67
												3.84625	3.92333	3.95375	4.345	4.16	3.988	4.13455	4.092	3.48667
												3.81333	4.12028	3.96966	4.03407	4.06049	3.92058	4.0634	4.2509	3.66222
											Nov.2020	3.935	4.16	4.1	4.08667	4.37875	3.89333	4.194	4.17818	3.81
												3.875	4.48	3.98	3.9125	3.98286	3.98286	4.18	4.40091	3.73
												4.00857	3.915	4.00857	4.13	4.20091	4.106	4.229	4.17909	3.58333
												3.93952	4.185	4.02952	4.04306	4.18751	3.99406	4.201	4.25273	3.70778

## Sheet: DBH
		Nov.2018	Jul.2019	Nov.2019	Jul.2020	Nov.2020					N1	N2	P1	P2	N1P1	N1P2	N2P1	N2P2	CK
	N1	0	0.731111	0.501162	0.557187	0.541239				Jul.2018	5.09167	5.525	5.45	4.84167	5.05	4.93333	5.09167	5.33333	4.7
	N2	0	0.414167	0.600944	0.803485	0.550263					4.76667	5.46667	4.8	4.11667	4.65833	4.825	4.925	5.45833	4.88889
	P1	0	0.541338	0.697828	0.420657	0.544251					4.40833	4.64167	4.14167	5.16667	4.83333	5.04167	4.23333	4.23333	4.3
	P2	0	0.972778	0.670833	0.499909	0.482758					4.75556	5.21111	4.79722	4.70833	4.84722	4.93333	4.75	5.00833	4.62963
	N1P1	0	0.6175	0.579722	0.781465	0.48303
	N1P2	0	0.65846	0.609419	0.614028	0.565366				Nov.2018	5.24333	5.78333	5.83333	5.15833	5.38333	5.54545	5.36	5.975	4.725
	N2P1	0	0.636566	0.592879	0.653148	0.681128					5.54167	5.76667	5.1	4.39167	4.99167	5.20833	5.13333	5.675	4.48
	N2P2	0	0.552222	0.589722	0.586187	0.666515					4.73333	5.76667	4.46667	5.09167	5.19167	5.55	4.45	4.33333	4.75
	CK	0	0.230667	0.219611	0.164389	0.218111					5.17278	5.77222	5.13333	4.88056	5.18889	5.4346	4.98111	5.32778	4.65167
										Jul.2019	6.01167	6.58583	6.255	6.03917	5.85667	6.35	5.85583	6.38833	5.65
											6.11833	6.36083	5.70818	4.91917	5.65167	5.51083	5.72636	6.19917	4.882
											5.58167	5.6125	5.06083	6.60167	5.91083	6.41833	5.27083	5.0525	4.115
											5.90389	6.18639	5.67467	5.85333	5.80639	6.09306	5.61768	5.88	4.88233
										Nov.2019	6.565	7.237	7.21833	6.66917	6.1675	6.68909	6.54833	7.15167	5.2125
											6.69182	6.88417	6.39583	5.64167	6.40167	6.44	6.33417	6.81083	4.71
											5.95833	6.24083	5.50333	7.26167	6.58917	6.97833	5.74917	5.44667	5.38333
											6.40505	6.78733	6.3725	6.52417	6.38611	6.70247	6.21056	6.46972	5.10194
										Jul.2020	6.903	8.18	7.84909	7.062	7.06182	7.25125	7.28111	7.165	5.64
											7.26455	7.367	6.53455	5.93273	6.97091	6.95909	6.5	7.53818	4.945
											6.71917	7.22545	5.99583	8.0775	7.47	7.73917	6.81	6.46455	5.214
											6.96224	7.59082	6.79316	7.02408	7.16758	7.3165	6.8637	7.05591	5.26633
										Nov.2020	7.62444	8.76833	8.3425	7.458	7.69182	7.54	7.86167	8.16	6.3
											7.81182	8.244	7.28889	6.58	7.42455	7.83727	7.60556	8.12364	5.18667
											7.07417	7.41091	6.38083	8.4825	7.83545	8.26833	7.16727	6.88364	4.96667
											7.50348	8.14108	7.33741	7.50683	7.65061	7.88187	7.54483	7.72242	5.48444

## Sheet: Annual branch length
	Jul.2018	Nov.2018	Jul.2019	Nov.2019	Jul.2020	Nov.2020				N1	N2	P1	P2	N1P1	N1P2	N2P1	N2P2	CK
N1	0	3.58333	6.69444	0.30303	14.8944	1.93721			Jul.2018	44.6667	52.6667	61.0833	62	57.4	59.9	59.6	64.3	55
N2	0	1.66667	9.36111	4.08333	9.38485	2.33636				63.5833	59.0833	52.3333	54.0833	54.1667	61.1	54.0833	72.5	57.875
P1	0	1.83333	13.9722	0.533333	7.34293	0.585642				60.3333	60.5833	61	57.5833	59.25	68.6667	67.1667	59.25	57
P2	0	2.55556	7.61111	0.994444	13.6515	1.07121				56.1944	57.4444	58.1389	57.8889	56.9389	63.2222	60.2833	65.35	56.625
N1P1	0	0.911111	8.38889	1.58333	13.7525	2.02618
N1P2	0	3.7601	15.9918	0.633249	10.1667	1.39352			Nov.2018	52.0833	58.5	60	59.6667	57.5833	64.6364	67.8333	64.2857	61.0833
N2P1	0	1.11667	19.346	0.279966	10.4296	0.832323				53.4167	51.0833	52.0833	53.4167	50.5833	53.4167	51.5	66.25	60.25
N2P2	0	1.74286	13.3571	3.26515	11.8226	0.825168				52.3333	57.75	56.8333	52.9167	59.9167	60.3333	58.1667	60.2857	48
CK	0	0.180556	13.8889	0.238889	8.78889	1.04167				52.6111	55.7778	56.3056	55.3333	56.0278	59.4621	59.1667	63.6071	56.4444
									Jul.2019	46.25	47.5833	49.4167	55.3333	50	40	30.5	55.8333	45.9167
										50.25	48.75	36	44.75	45.5	44.1111	45.5455	51.25	45.3333
										41.25	42.9167	41.5833	43.0833	47.4167	46.3	43.4167	43.6667	36.4167
										45.9167	46.4167	42.3333	47.7222	47.6389	43.4704	39.8207	50.25	42.5556
									Nov.2019	49.8333	46	51	54.6	51.75	43.6364	43	50.4545	41.1
										44.0909	39.4167	33.9	41	39	42.875	33.4	47.5	46.1
										42.9167	41.5833	40.5	44.5833	47.4167	42	42.2222	43	39.75
										45.6136	42.3333	41.8	46.7278	46.0556	42.8371	39.5407	46.9848	42.3167
									Jul.2020	32.9	31	29.3333	34.1	36.6364	32.625	32.3333	42.8	33.8333
										33.0909	35.3	31.4545	34.5455	28.0909	32.6364	29	34.7778	34.25
										26.1667	32.5455	42.5833	30.5833	32.1818	32.75	26	27.9091	32.5
										30.7192	32.9485	34.4571	33.0763	32.303	32.6705	29.1111	35.1623	33.5278
									Nov.2020	30.1111	30	32.4	33	32.4669	29.7778	28.2	32.6364	32.5
										30.8182	33.2	29.7143	33.1818	27.3636	31.6364	30	41.375	31.3333
										25.4167	28.6364	39.5	29.8333	31	32.4167	26.6364	29	33.625
										28.782	30.6121	33.8714	32.0051	30.2768	31.2769	28.2788	34.3371	32.4861

## Sheet: Annual leaf length
		Nov.2018	Jul.2019	Nov.2020					N1	N2	P1	P2	N1P1	N1P2	N2P1	N2P2	CK
N1		0	0.532778	1.79394				Jul.2018	10.8083	11.225	11.1333	10.6333	11.55	10.8833	10.64	11.4333	9.73
N2		0	1.29944	1.13727					11.0167	10.275	10.2417	10.2167	10.85	10.6	10.83	10.0833	10.4417
P1		0	0.846111	0.927778					10.6167	10.55	9.15833	9.70833	10.6	10.25	10.47	9.76667	10.05
P2		0	0.597222	0.823081					10.8139	10.6833	10.1778	10.1861	11	10.5778	10.6467	10.4278	10.0739
N1P1		0	0.102778	1.81641
N1P2		0	1.14116	1.06124				Nov.2018	11.31	11.53	10.62	10.3833	11.4667	10.8273	10.675	11.0583	9.98333
N2P1		0	0.594444	2.6867					10.55	11.16	10.4083	10.4417	11.1083	10.75	10.7	10.475	10.2333
N2P2		0	1.00833	1.54823					11.1417	9.975	9.7	10.5583	10.9583	11.1083	10.9417	10.4417	10.1083
CK		0	0.658333	0.318849					11.0006	10.8883	10.2428	10.4611	11.1778	10.8952	10.7722	10.6583	10.1083
								Jul.2019	11.525	11.98	12.3083	10.1667	11.625	12.2091	11.7333	12.25	10.6583
									12.5	12.8833	11.125	12.4417	11.5667	11.6333	12.5333	12.2917	10.5583
									10.575	11.7	9.83333	10.5667	10.65	12.2667	9.83333	10.4583	11.0833
									11.5333	12.1878	11.0889	11.0583	11.2806	12.0364	11.3667	11.6667	10.7667
								Nov.2020	13.8333	13.5333	13.725	11.62	12.8273	12.5125	15.0833	12.9083	10.8375
									13.4818	13.56	11.7	12.2909	14.3	13.9636	13.6222	14.9909	11.1857
									12.6667	12.8818	10.625	11.7333	12.1636	12.8167	13.4545	11.7455	11.2333
									13.3273	13.3251	12.0167	11.8814	13.097	13.0976	14.0534	13.2149	11.0855

## Sheet: Soil total nitrogen
	2018	2019	2020				N1	N2	P1	P2	N1P1	N1P2	N2P1	N2P2	CK
N1	0.2248	0.183787	0.258273			2018	0.11722	0.36	0.29284	0.2241	0.14002	0.16274	0.15687	0.20481	0.15835
N2	0.339027	0.20996	0.27978				0.23617	0.31598	0.2295	0.12116	0.20168	0.30618	0.12456	0.22764	0.1749
P1	0.217027	0.116533	0.1924				0.32101	0.3411	0.12874	0.37288	0.40274	0.24778	0.16315	0.25646	0.15821
P2	0.23938	0.12438	0.24932				0.2248	0.339027	0.217027	0.23938	0.248147	0.2389	0.148193	0.229637	0.16382
N1P1	0.248147	0.146307	0.233427
N1P2	0.2389	0.12062	0.23908			2019	0.18088	0.20996	0.10624	0.08112	0.1568	0.1366	0.15132	0.103	0.13706
N2P1	0.148193	0.135013	0.167473				0.14092	0.20996	0.11736	0.12496	0.1162	0.1006	0.10076	0.0994	0.15647
N2P2	0.229637	0.0981267	0.23658				0.22956	0.20996	0.126	0.16706	0.16592	0.12466	0.15296	0.09198	0.11532
CK	0.16382	0.136283	0.20458				0.183787	0.20996	0.116533	0.12438	0.146307	0.12062	0.135013	0.0981267	0.136283
						2020	0.34456	0.39714	0.18682	0.31836	0.1619	0.19892	0.22756	0.19634	0.2291
							0.29424	0.1471	0.26138	0.27218	0.3046	0.3392	0.13354	0.19682	0.19232
							0.13602	0.2951	0.129	0.15742	0.23378	0.17912	0.14132	0.31658	0.19232
							0.258273	0.27978	0.1924	0.24932	0.233427	0.23908	0.167473	0.23658	0.20458

## Sheet: Total phosphorus in soil
	N1	N2	P1	P2	N1P1	N1P2	N2P1	N2P2	CK			N1	N2	P1	P2	N1P1	N1P2	N2P1	N2P2	CK
2018	0.02988	0.0424733	0.03381	0.06445	0.04406	0.0424867	0.0289433	0.04389	0.0225773		2018	0.03856	0.03568	0.03772	0.05687	0.0237	0.02148	0.03658	0.03967	0.02344
2019	0.01402	0.00467333	0.0098	0.0168	0.00728667	0.00712667	0.00827333	0.00918	0.0110267			0.02564	0.03654	0.04	0.06824	0.05424	0.0642	0.02556	0.04516	0.02508
2020	0.0448533	0.0529133	0.0376	0.0679067	0.04626	0.0477667	0.0390133	0.0451533	0.0413667			0.02544	0.0552	0.02371	0.06824	0.05424	0.04178	0.02469	0.04684	0.019212
												0.02988	0.0424733	0.03381	0.06445	0.04406	0.0424867	0.0289433	0.04389	0.0225773
											2019	0.01938	0.01128	0.00666	0.0152	0.01704	0.0162	0.01384	0.01374	0.01604
												0.01134	0.00136	0.00574	0.0152	0.00266	0.00176	0.00148	6e-05	0.001
												0.01134	0.00138	0.017	0.02	0.00216	0.00342	0.0095	0.01374	0.01604
												0.01402	0.00467333	0.0098	0.0168	0.00728667	0.00712667	0.00827333	0.00918	0.0110267
											2020	0.05536	0.0654	0.03424	0.04774	0.02584	0.02614	0.02938	0.03932	0.0305
												0.0396	0.0494	0.05254	0.04762	0.06162	0.07882	0.0279	0.03932	0.05728
												0.0396	0.04394	0.02602	0.10836	0.05132	0.03834	0.05976	0.05682	0.03632
												0.0448533	0.0529133	0.0376	0.0679067	0.04626	0.0477667	0.0390133	0.0451533	0.0413667

## Sheet: Soil alkali hydrolyzable nitrog
N1	N2	P1	P2	N1P1	N1P2	N2P1	N2P2	CK				N1	N2	P1	P2	N1P1	N1P2	N2P1	N2P2	CK
233.917	329.583	207.083	235.083	303.917	190.75	217.583	246.75	216.417			2018	194.25	295.75	236.25	232.75	218.75	180.25	194.25	134.75	236.25
205.917	238.583	173.25	225.75	203.583	155.75	188.417	134.75	186.083				225.75	355.25	225.75	225.75	253.75	225.75	159.25	327.25	218.75
214.083	355.25	265.417	252.583	235.083	252.583	229.25	225.75	265.417				281.75	337.75	159.25	246.75	439.25	166.25	299.25	278.25	194.25
												233.917	329.583	207.083	235.083	303.917	190.75	217.583	246.75	216.417
											2019	215.25	134.75	131.25	225.75	232.75	162.75	180.25	145.25	183.75
												201.25	232.75	159.25	225.75	145.25	159.25	110.25	99.75	197.75
												201.25	348.25	229.25	225.75	232.75	145.25	274.75	159.25	176.75
												205.917	238.583	173.25	225.75	203.583	155.75	188.417	134.75	186.083
											2020	222.25	334.25	411.25	239.75	190.75	222.25	187.25	162.75	253.75
												267.75	295.75	253.75	250.25	267.75	365.75	152.25	229.25	355.25
												152.25	435.75	131.25	267.75	246.75	169.75	348.25	285.25	187.25
												214.083	355.25	265.417	252.583	235.083	252.583	229.25	225.75	265.417

## Sheet: Soil available phosphorus
	N1	N2	P1	P2	N1P1	N1P2	N2P1	N2P2	CK				N1	N2	P1	P2	N1P1	N1P2	N2P1	N2P2	CK
2019	2.47055	3.15894	7.21279	7.51874	1.93514	7.36576	3.92382	8.58957	3.84733			2019	0.481872	4.84167	9.43093	5.75952	0.940799	4.84167	2.54704	9.88986	3.92382
2020	4.15328	4.00031	6.5244	8.13064	6.14196	7.97767	4.99465	8.74254	5.07113				3.00597	2.31758	6.67737	7.82469	1.39972	6.21845	4.84167	8.05415	3.23543
													3.92382	2.31758	5.53006	8.97201	3.46489	11.0372	4.38274	7.82469	4.38274
													2.47055	3.15894	7.21279	7.51874	1.93514	7.36576	3.92382	8.58957	3.84733
												2020	6.21845	4.84167	4.84167	11.955	5.75952	9.20147	3.23543	14.0202	5.53006
													3.46489	2.31758	4.84167	6.21845	5.53006	5.53006	3.23543	3.23543	6.21845
													2.7765	4.84167	9.88986	6.21845	7.1363	9.20147	8.51308	8.97201	3.46489
													4.15328	4.00031	6.5244	8.13064	6.14196	7.97767	4.99465	8.74254	5.07113

## Sheet: Annual coniferous nitrogen1
		N1	N2	P1	P2	N1P1	N1P2	N2P1	N2P2	CK			N1	N2	P1	P2	N1P1	N1P2	N2P1	N2P2	CK
	Jul.2019	1.5	1.58667	1.36	1.34	1.42	1.49	1.73667	1.57	1.53		Jul.2019	1.41	1.67	1.49	1.37	1.42	1.58	1.65	1.59	1.52
	Nov.2019	1.67333	1.73333	1.38	1.37333	1.50667	1.59667	1.86667	1.71	1.47			1.67	1.67	1.38	1.29	1.75	1.57	1.93	1.64	1.42
	Jul.2020	1.57333	1.67667	1.36	1.43667	1.78667	1.61	1.91333	1.73333	1.57			1.42	1.42	1.21	1.36	1.09	1.32	1.63	1.48	1.65
	Nov.2020	1.67333	1.68333	1.45667	1.45	1.77667	1.74333	1.94667	1.87667	1.53			1.5	1.58667	1.36	1.34	1.42	1.49	1.73667	1.57	1.53
												Nov.2019	1.63	1.63	1.37	1.45	1.42	1.72	1.78	1.74	1.48
													1.8	1.59	1.42	1.26	1.85	1.61	2.04	1.71	1.36
													1.59	1.98	1.35	1.41	1.25	1.46	1.78	1.68	1.57
													1.67333	1.73333	1.38	1.37333	1.50667	1.59667	1.86667	1.71	1.47
												Jul.2020	1.47	1.47	1.56	1.39	1.68	1.79	1.65	1.79	1.56
													1.78	1.78	1.26	1.5	1.63	1.63	2.15	1.93	1.62
													1.47	1.78	1.26	1.42	2.05	1.41	1.94	1.48	1.53
													1.57333	1.67667	1.36	1.43667	1.78667	1.61	1.91333	1.73333	1.57
												Nov.2020	1.59	1.62	1.48	1.33	1.69	1.91	1.75	1.75	1.52
													1.81	1.62	1.48	1.45	1.79	1.79	1.94	2.13	1.49
													1.62	1.81	1.41	1.57	1.85	1.53	2.15	1.75	1.58
													1.67333	1.68333	1.45667	1.45	1.77667	1.74333	1.94667	1.87667	1.53

## Sheet: Annual coniferous phosphorus
		N1	N2	P1	P2	N1P1	N1P2	N2P1	N2P2	CK
	Jul.2019	0.106317	0.121725	0.115617	0.124108	0.108517	0.122625	0.100467	0.11225	0.119008			N1	N2	P1	P2	N1P1	N1P2	N2P1	N2P2	CK
	Nov.2019	0.138642	0.135025	0.147533	0.1621	0.150342	0.134308	0.1344	0.143792	0.146125		Jul.2019	0.11415	0.121125	0.107825	0.123975	0.111125	0.12225	0.1037	0.14655	0.125025
	Jul.2020	0.129658	0.13055	0.11835	0.145	0.130083	0.109942	0.115708	0.119425	0.120758			0.099175	0.114725	0.111625	0.123975	0.10015	0.1231	0.089525	0.098775	0.102125
	Nov.2020	0.143742	0.136558	0.1315	0.14735	0.14055	0.129583	0.139392	0.137258	0.1426			0.105625	0.129325	0.1274	0.124375	0.114275	0.122525	0.108175	0.091425	0.129875
													0.106317	0.121725	0.115617	0.124108	0.108517	0.122625	0.100467	0.11225	0.119008
												Nov.2019	0.133025	0.144475	0.1194	0.1621	0.139675	0.13065	0.124575	0.13635	0.1353
													0.142575	0.152075	0.1776	0.1621	0.17375	0.14835	0.1415	0.13635	0.1409
													0.140325	0.108525	0.1456	0.1621	0.1376	0.123925	0.137125	0.158675	0.162175
													0.138642	0.135025	0.147533	0.1621	0.150342	0.134308	0.1344	0.143792	0.146125
												Jul.2020	0.125975	0.12975	0.117	0.145	0.121675	0.1099	0.107025	0.11525	0.124925
													0.124325	0.132575	0.12005	0.145	0.12305	0.124575	0.114075	0.114	0.12255
													0.138675	0.129325	0.118	0.145	0.145525	0.09535	0.126025	0.129025	0.1148
													0.129658	0.13055	0.11835	0.145	0.130083	0.109942	0.115708	0.119425	0.120758
												Nov.2020	0.15465	0.142875	0.1414	0.14735	0.14145	0.1117	0.139075	0.133675	0.130425
													0.1317	0.13485	0.12185	0.14735	0.1163	0.1362	0.12565	0.152875	0.1468
													0.144875	0.13195	0.13125	0.14735	0.1639	0.14085	0.15345	0.125225	0.150575
													0.143742	0.136558	0.1315	0.14735	0.14055	0.129583	0.139392	0.137258	0.1426

[truncated: 2 more sheets: Nitrogen in new needles, New coniferous phosphorus]
